# Supplementary material
Source: PubMed Central journal article supplement (PMC3084324)
Supplement: NIHMS257466-supplement-1.pdf [file NIHMS257466-supplement-1.pdf]

## The vacuolar-ATPase (V-ATPase) modulates matrix metalloproteinase (MMP) isoforms in human pancreatic cancer

Chuhan Chung, Christopher C Mader, John Schmitz, Jorunn Atladottir, Phillip Fitchev, Mona Cornwell, Anthony J Koleske, Susan Crawford, Fred Gorelick

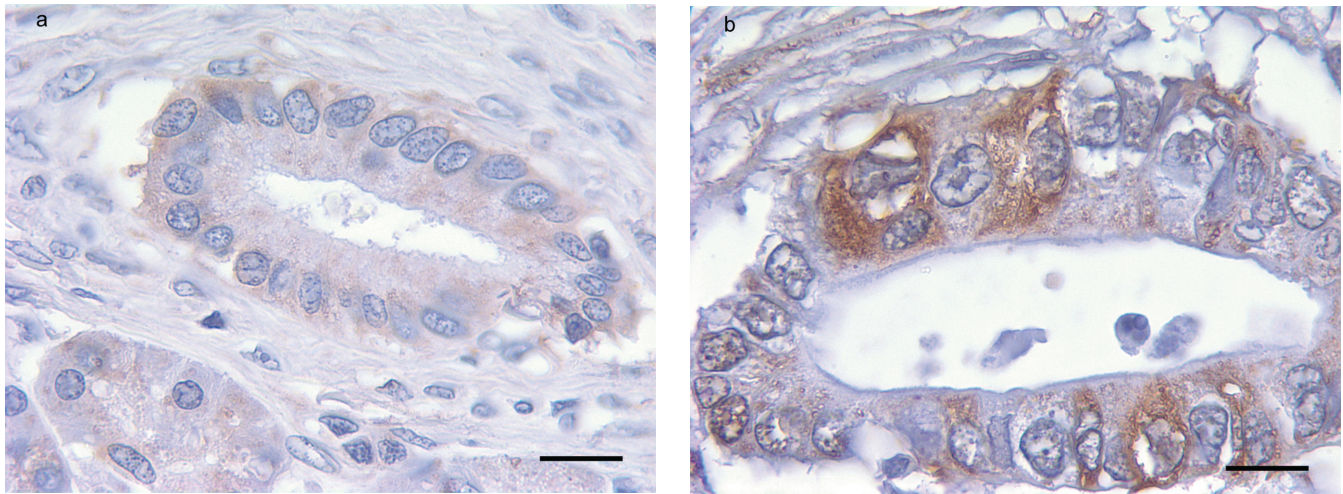

**Supplementary Figure 1.** Increased intensity and loss of polarized staining for the v-ATPase  $V_1E$  subunit characterizes high grade from low grade PanIN lesions. An early low-grade PanIN lesion (**a**) demonstrates basally-oriented nuclei and increased N to C ratio with central clearing of the duct. A high-grade PanIN (**b**) reveals increased  $V_1E$  labeling intensity and a diffuse staining pattern. Scale bar: 80  $\mu\text{m}$ .
