# Supplementary material
Source: PubMed Central journal article supplement (PMC3084324)
Supplement: NIHMS257466-supplement-3.pdf [file NIHMS257466-supplement-3.pdf]

**The vacuolar-ATPase (V-ATPase) modulates matrix metalloproteinase (MMP) isoforms  
in human pancreatic cancer**

Chuhan Chung, Christopher C Mader, John Schmitz, Jorunn Atladottir, Phillip Fitchev, Mona Cornwell, Anthony J Koleske, Susan Crawford, Fred Gorelick

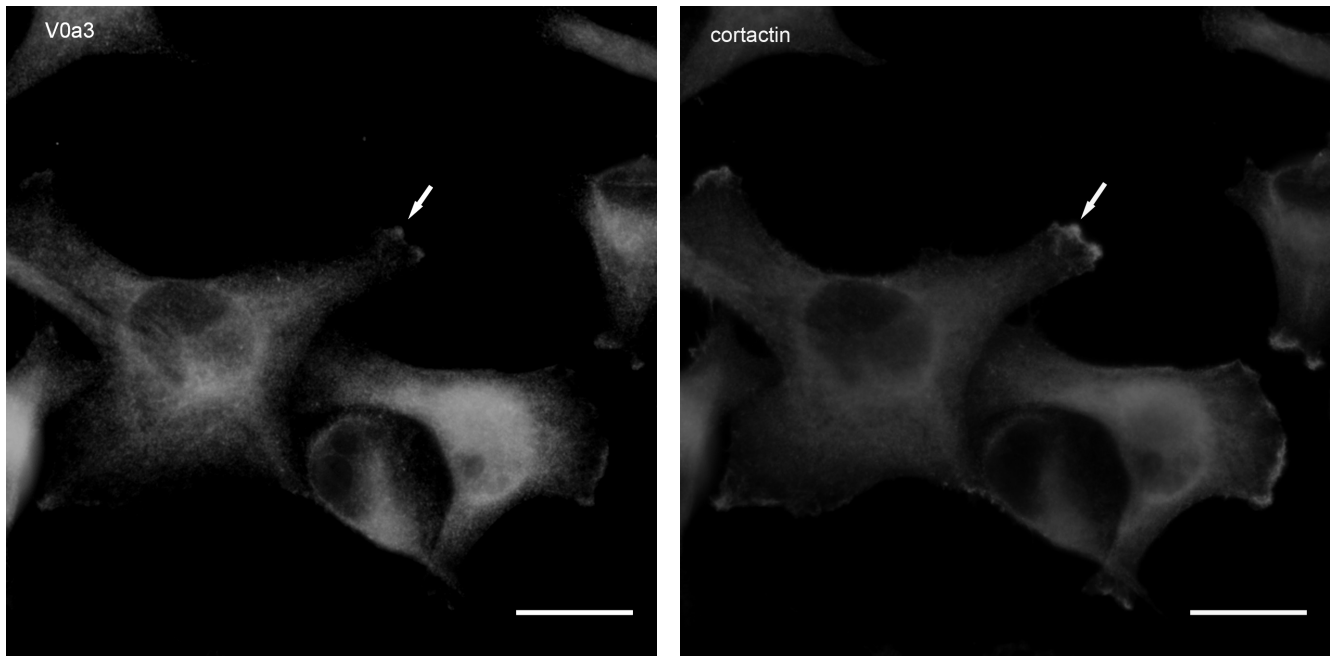

**Supplementary Figure 3.** Immuno-staining of the v-ATPase  $V_{0a3}$  subunit (left, arrow) demonstrates localization with cortactin (right, arrow) at the leading edge of Panc-1 cells.
