# Supplementary material
Source: PubMed Central journal article supplement (PMC3084324)
Supplement: NIHMS257466-supplement-4.pdf [file NIHMS257466-supplement-4.pdf]

## The vacuolar-ATPase (V-ATPase) modulates matrix metalloproteinase

### (MMP) isoforms in human pancreatic cancer

Chuhan Chung, Christopher C Mader, John Schmitz, Jorunn Atladottir, Phillip Fitchev, Mona Cornwell, Anthony J Koleske, Susan Crawford, Fred Gorelick

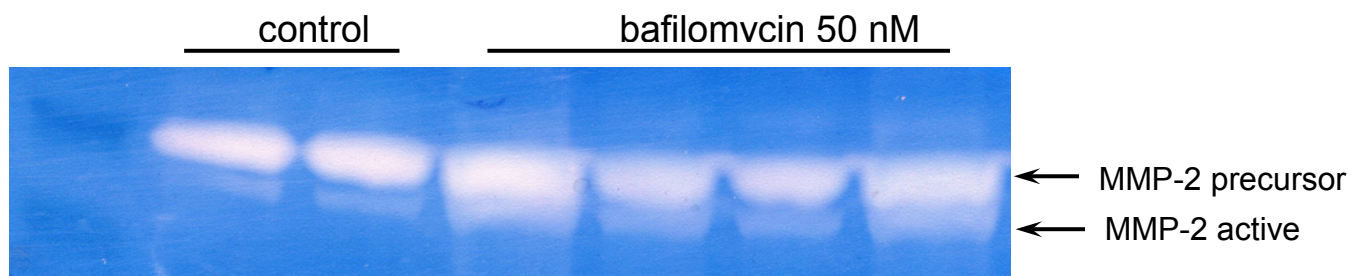

**Supplementary Figure 4.** Zymography of Panc-1 cell conditioned medium reveals that bafilomycin 50nM treatment induces the activity of the most active MMP-2 isoforms. Shown are two controls and four separate experiments with bafilomycin treatment.
