# Supplementary material
Source: PubMed Central journal article supplement (PMC3084324)
Supplement: NIHMS257466-supplement-5.pdf [file NIHMS257466-supplement-5.pdf]

**The vacuolar-ATPase (V-ATPase) modulates matrix metalloproteinase  
(MMP) isoforms in human pancreatic cancer**

Chuhan Chung, Christopher C Mader, John Schmitz, Jorunn Atladottir, Phillip Fitchev, Mona Cornwell, Anthony J Koleske, Susan Crawford, Fred Gorelick

**Supplementary Table 1.**

Sequences used to inhibit the human V<sub>1</sub>E vATPase:

E(1): 5'-ACTAAGATTATGGAATATA-3'

E(2): 5'-CAGCGATGCTGACGTGCAAAA-3'

Control: shRNA pSupervector (Oligoengine)

**SupplementaryTable 1.** List of primers used to inhibit the V<sub>1</sub>E subunit using shRNA constructs.
